# Supplementary material for: A molecular meccano kit †
Source: Royal Society of Chemistry journal article supplement (doi:10.1039/b003769i), 2000-01-01
Supplement: b003769i.doc [file b003769i.doc]

CAPTIONS TO SUPPLEMENTARY FIGURES

PDB files are available for the majority of structures presented in the paper. The figure captions used in the paper are reproduced here as an aid to identifying these structures.

Figure S2 One of the two distinct superstructures adopted in the solid state by the [2]pseudorotaxane [DB24C8·DBA]+.

Figure S3 – Stacking of the benzyl rings of the [2]pseudorotaxane [DB24C8·DBA]+ produces an infinite linear pseudopolyrotaxane.

Figure S4 The solid-state superstructure of a [3]pseudorotaxane [(DB24C8)2·**1**]2+ formed between a thread-like molecule—containing *two* ammonium centres (**1**·2PF6)—and *two* DB24C8 macrocycles.

Figure S5 The solid-state superstructure of a [4]pseudorotaxane [(DB24C8)3·**2**]3+ formed between a thread-like molecule—containing *three* ammonium centres (**2**·3PF6)—and *three* DB24C8 macrocycles.

Figure S7 The solid-state superstructure of the [2]pseudorotaxane [DB24C8·**4**]+ formed between the *para*-carboxylic acid-substituted DBA+ cation **4**+ and DB24C8.

Figure S8 An infinite linear daisy-chain-like array of [DB24C8·**4**]+ is formed as a result of hydrogen bonding between the carboxylic acid of one thread and the crown ether component of a neighbouring [2]pseudorotaxane.

Figure S9 The solid-state superstructure of the [2]pseudorotaxane [DB24C8·**5**]+ formed between the bis(*para*-carboxylic acid)-substituted DBA+ cation **5**+ and DB24C8.

Figure S10 Despite the formation of a carboxylic acid dimer between individual [2]pseudorotaxanes, the possibility of an infinite hydrogen bonded polymer is negated by the formation of hydrogen bonds from the terminal carboxylic acid protons to included acetone molecules in the solid-state superstructure of [DB24C8·**5**]+.

Figure S11 The solid-state superstructure of the [2]pseudorotaxane [DB24C8·**6**]+ formed between the bis(*meta*-carboxylic acid)-substituted DBA+ cation **6**+ and DB24C8.

Figure S12 The X-ray crystallographic analysis of [DB24C8·**6**][PF6] reveals the formation—in the solid state—of a carboxyl-dimer-linked main chain pseudopolyrotaxane.

Figure S13 The solid-state superstructure of the [2]pseudorotaxane [DB24C8·**7**]+ formed between the isophthalic acid-substituted DBA+ cation **7**+ and DB24C8.

Figure S14 The side-chain pseudopolyrotaxane formed as a result of carboxylic acid dimerisation in the extended superstructure of [DB24C8·**7**]+.

Figure S15 When grown from a MeCN/Et2O solution, crystals of TB24C8 can be seen to contain enclathrated acetonitrile molecules.

Figure S16 In the absence of MeCN, the crown ether TB24C8 crystallises without ordered solvent molecules.

Figure S17 One of the four crystallographically independent superstructures with a [2]pseudorotaxane geometry observed in the X-ray analysis of [TB24C8·DBA][PF6].

Figure S18 The extensively C–H···F hydrogen bond-stabilised extended superstructure of the complex [TB24C8·DBA][PF6].

Figure S19 The solid-state superstructure of the [2]pseudorotaxane [BMP25C8·DBA]+ formed between the DBA+ cation and BMP25C8.

Figure S20 Discrete [BMP25C8·DBA]+ supermolecules are linked in the solid state to form extended sheets.

Figure S21 The solid-state structure of BMP25C8.

Figure S22 Constricted nanotubes—stabilised by intermolecular C–H···O hydrogen bonds—are formed by the stacking of BMP25C8 molecules in the solid state.

Figure S23 The solid-state superstructure of the [2]pseudorotaxane [TB27C9·(*p*-CO2Me)2-DBA]+ formed between the *p*-CO2Me-disubstituted DBA+ cation and TB27C9.

Figure S24 The extended superstructure of [TB27C9·(*p*-CO2Me)2-DBA][PF6] consists of extended sheets that are stabilised by inter-[2]pseudorotaxane C–H··· hydrogen bonds.

Figure S25 The solid-state superstructure of a *double-stranded* [3]pseudorotaxane [BPP34C10·(DBA)2]2+ formed between BPP34C10 and DBA·PF6.

Figure S27 The solid-state superstructure of the *double-threaded, double-encircled* [4]pseudorotaxane [(BPP34C10)2·(**1**)2]4+ formed between BPP34C10 and **1**2+.

Figure S28 Individual [2 + 2] superbundles form columns in the solid state. The interstitial PF6– anions may play some role in the assembly of this infinite one-dimensional array.

Figure S29 The solid-state superstructure of the five-component superbundle [(BPP34C10)3·(**8**)2]6+ formed between the trifurcated tris-ammonium cation **8**3+ and the ditopic crown ether BPP34C10.

Figure S30 Interleaved one-dimensional arrays of the five component superbundle [(BPP34C10)3·(**8**)2]6+ are formed in the solid state.

Figure S31 Co-crystallisation of BPP34C10 and **9**·4PF6 affords a six-component superbundle that is a supramolecular analogue of the photosynthetic special pair.

Figure S32 In a manner analogous to DBA·PF6, **4**·PF6 forms a *double-threaded* [3]pseudorotaxane when co-crystallised with BPP34C10.

Figure S33 Individual [BPP34C10·(**4**)2][2PF6] [3]pseudorotaxanes dimerise in the solid state *via* the formation of carboxylic acid dimers.

Figure S34 Similarly to **4**·PF6, its *meta*-substituted cousin **10**·PF6 forms a 1:2 complex when co-crystallised with BPP34C10.

Figure S35 Discrete [BPP34C10·(**10**)2][2PF6] supermolecules dimerise—in the solid-state—as a result of carboxyl dimer formation.

Figure S36 Two **7**+ cations thread through the cavity of BPP34C10 in a centrosymmetric fashion, resulting in the formation of a [3]pseudorotaxane [BPP34C10·(**7**)2]2+ in the solid state.

Figure S37 Analysis of the extended solid-state superstructure adopted by [BPP34C10·(**7**)2]2+ reveals the existence of an interwoven cross-linked supramolecular polymer.

Figure S38 The extended crown ether TPP51C15 co-crystallises with *three* equivalents of DBA·PF6 to give a *triple-threaded* [4]pseudorotaxane [TPP51C15·(DBA)3]3+. Note how a PF6– anion occupies a cleft in the superstructure.

Figure S39 The extended crown ether TPP68C20 co-crystallises with *four* equivalents of DBA·PF6 to give a *quadruple-threaded* [5]pseudorotaxane [TPP68C20·(DBA)4]4+. One PF6– anion is encapsulated completely within the superstructure.

Figure S42 The solid-state superstructure of a head-to-tail dimer formed by the hybrid crown ether/ammonium ion molecule.

Figure S43 The solid-state superstructure of a *triple-threaded* 1:1 complex formed between a trifurcated tris(ammonium) thread and a complementary triphenylene-based tris(DB24C8) derivative.
